# Supplementary material
Source: Springer Nature journal article supplement (https://www.springermedizin.de/resource/supplementary/12947_2010_372_MOESM1_ESM.pdf/9556828)

**A**

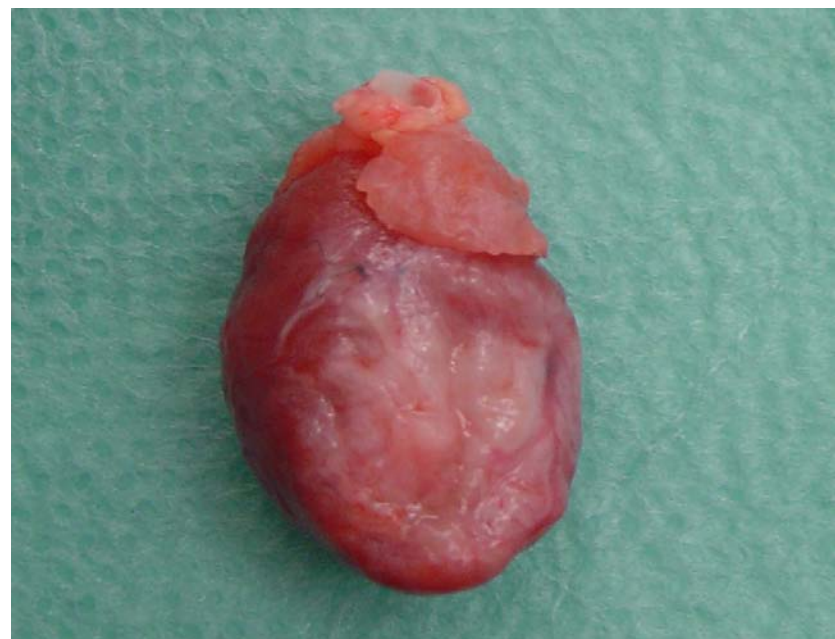

**B**

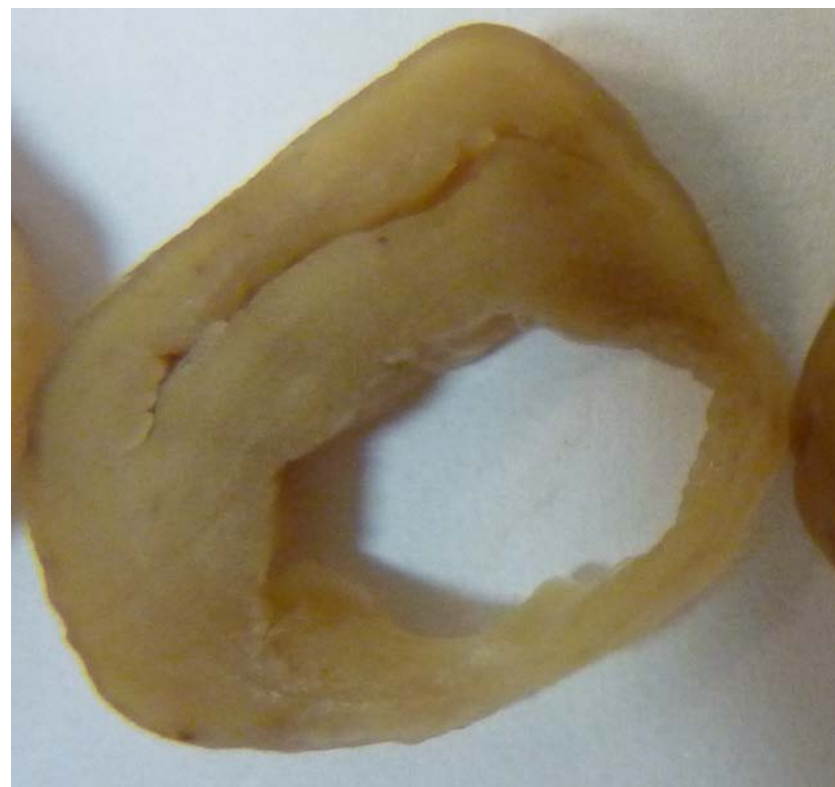

Supplement: MOESM1 [file 9556828]
